# Supplementary material for: Effects of Flight on Gene Expression and Aging in the Honey Bee Brain and Flight Muscle
Source: Insects. 2012 Dec 20;4(1):9–30. doi: 10.3390/insects4010009 (PMC4553427; doi:10.3390/insects4010009)
Supplement: Supplementary File 1 [file insects-04-00009-s001.pdf]

**All known genes only expressed in forager young vs. forager oldest.**

| Gene name | Description                                                                                                                                                      |
|-----------|------------------------------------------------------------------------------------------------------------------------------------------------------------------|
| LOC552406 | similar to thyroid hormone receptor interactor 4                                                                                                                 |
| LOC550922 | similar to mab-2 CG4746-PA                                                                                                                                       |
| LOC724511 | similar to zinc finger protein 239                                                                                                                               |
| LOC725732 | similar to CG30492-PB, isoform B                                                                                                                                 |
| LOC409141 | similar to CG7272-PA                                                                                                                                             |
| LOC410775 | similar to wing blister CG15288-PB, isoform B                                                                                                                    |
| trxr-1    | thioredoxin reductase                                                                                                                                            |
| csnk1a1   | similar to casein kinase 1, alpha 1                                                                                                                              |
| LOC726679 | similar to CG5913-PA                                                                                                                                             |
| LOC727045 | similar to yellow-e2 CG17044-PA                                                                                                                                  |
| LOC724136 | similar to CG6305-PA                                                                                                                                             |
| DWVgp1    | DWVgp1                                                                                                                                                           |
| jhamt     | similar to juvenile hormone acid methyltransferase CG17330-PA                                                                                                    |
| LOC411021 | similar to Ugt86Dc CG4739-PA                                                                                                                                     |
| LOC725700 | similar to vacuolar protein sorting 29 isoform 2                                                                                                                 |
| LOC412767 | similar to CG2016-PB                                                                                                                                             |
| LOC725149 | similar to GPI7 protein                                                                                                                                          |
| LOC551537 | similar to enoyl Coenzyme A hydratase domain containing 3                                                                                                        |
| Hydr2     | similar to CG3488-PA                                                                                                                                             |
| LOC411927 | similar to CG15111-PB, isoform B                                                                                                                                 |
| rpl21     | similar to Ribosomal protein L21 CG12775-PA                                                                                                                      |
| LOC410487 | similar to CG2446-PC, isoform C                                                                                                                                  |
| LOC409573 | similar to CG1832-PA, isoform A                                                                                                                                  |
| Cpap3-c   | similar to Gasp CG10287-PA                                                                                                                                       |
| LOC411269 | similar to CG14621-PA                                                                                                                                            |
| LOC724457 | hypothetical protein LOC724457                                                                                                                                   |
| LOC409336 | similar to CG4330-PA                                                                                                                                             |
| GMCOX4    | similar to CG9518-PA                                                                                                                                             |
| LOC726400 | similar to Fork head domain protein FD2                                                                                                                          |
| LOC410600 | similar to Neu3 CG7649-PB, isoform B                                                                                                                             |
| LOC413274 | similar to Guanylyl cyclase at 89Db CG14886-PA                                                                                                                   |
| rho-5     | similar to rhomboid-5 CG33304-PA                                                                                                                                 |
| CAP-D2    | similar to Condensin complex subunit 1 (Chromosome condensation-related SMC-associated protein 1) (Chromosome-associated protein D2) (hCAP-D2) (XCAP-D2 homolog) |
| Dap160    | similar to intersectin 2 isoform 3                                                                                                                               |
| LOC725547 | similar to CG6131-PA                                                                                                                                             |

---

|           |                                                                                                                                                                                                                                                            |
|-----------|------------------------------------------------------------------------------------------------------------------------------------------------------------------------------------------------------------------------------------------------------------|
| LOC551732 | similar to Protein farnesyltransferase/geranylgeranyltransferase type I alpha subunit (CAAX farnesyltransferase alpha subunit) (Ras proteins prenyltransferase alpha) (FTase-alpha) (Type I protein geranylgeranyltransferase alpha subunit) (GGTase-I-... |
| Mxp       | similar to proboscipedia CG31481-PD, isoform D                                                                                                                                                                                                             |
| LOC724611 | similar to CG11323-PA                                                                                                                                                                                                                                      |
| ras       | similar to Inosine-5-monophosphate dehydrogenase (IMP dehydrogenase) (IMPDH) (IMPD) (Protein raspberry)                                                                                                                                                    |
| LOC725421 | similar to CG7759-PB, isoform B                                                                                                                                                                                                                            |
| rtet      | similar to tetracycline resistance CG5760-PA                                                                                                                                                                                                               |
| LOC411412 | similar to CG11665-PA                                                                                                                                                                                                                                      |
| APP-BP1   | similar to amyloid beta precursor protein binding protein 1                                                                                                                                                                                                |
| NT-12     | similar to CG8291-PA, isoform A                                                                                                                                                                                                                            |
| LOC412815 | similar to CG3523-PA                                                                                                                                                                                                                                       |
| Mvl       | malvolio                                                                                                                                                                                                                                                   |
| LOC724627 | hypothetical protein LOC724627                                                                                                                                                                                                                             |
| LOC552061 | similar to lemur tyrosine kinase 3                                                                                                                                                                                                                         |
| MRPL20    | similar to mitochondrial ribosomal protein L20 CG11258-PA                                                                                                                                                                                                  |
| KEL       | similar to Ring canal kelch protein                                                                                                                                                                                                                        |
| LOC411564 | similar to CG32645-PB                                                                                                                                                                                                                                      |
| LOC552717 | similar to CG5590-PA                                                                                                                                                                                                                                       |
| LOC727381 | similar to tRNA phosphotransferase 1 isoform 1                                                                                                                                                                                                             |
| LOC552029 | hypothetical LOC552029                                                                                                                                                                                                                                     |
| LOC727201 | similar to Carbamoyl-phosphate synthase [ammonia], mitochondrial precursor (Carbamoyl-phosphate synthetase I) (CPSase I)                                                                                                                                   |
| LOC409207 | similar to Synaptic vesicle membrane protein VAT-1 homolog                                                                                                                                                                                                 |

---

**All known genes expressed only in forager old vs. forager oldest.**

| Gene name | Description                                                          |
|-----------|----------------------------------------------------------------------|
| Sirt2     | similar to Sirt2 CG5085-PA                                           |
| jim       | similar to jim CG11352-PC, isoform C                                 |
| LOC409063 | similar to black CG7811-PA                                           |
| LOC408396 | similar to rhea CG6831-PA                                            |
| LOC725475 | similar to COMM domain containing 8                                  |
| LOC551270 | similar to CG5222-PA                                                 |
| Mrjp1     | major royal jelly protein 1                                          |
| LOC411777 | similar to CG17255-PA, isoform A                                     |
| mGluR2    | similar to Metabotropic glutamate receptor 7 precursor (mGluR7)      |
| Mrjp2     | major royal jelly protein 2                                          |
| LOC411476 | similar to CG11505-PB, isoform B                                     |
| LOC725607 | similar to CG18292-PA                                                |
| Mrjp5     | major royal jelly protein 5                                          |
| bib       | similar to big brain CG4722-PA                                       |
| Tpx-4     | similar to Peroxiredoxin 2540 CG11765-PA                             |
| Med15     | similar to Mediator complex subunit 15 CG4184-PA                     |
| LOC412235 | similar to Caspase precursor (drICE)                                 |
| LOC552787 | similar to DNA topoisomerase 3-beta-1 (DNA topoisomerase III beta-1) |
| LOC726826 | similar to Moca-cyp CG1866-PA, isoform A                             |
| LOC552065 | similar to CG4785-PA                                                 |

**All known genes expressed only in nurse old vs. nurse oldest.**

| <b>Gene name</b> | <b>Description</b>                      |
|------------------|-----------------------------------------|
| 1790120          | hypothetical LOC551946                  |
| 1794082          | similar to CG32645-PB                   |
| 1790046          | similar to Fork head domain protein FD2 |

**All known genes expressed only in nurse young vs. nurse oldest.**

| <b>Gene name</b> | <b>Description</b>                                   |
|------------------|------------------------------------------------------|
| LOC724457        | hypothetical protein LOC724457                       |
| Mvl              | malvolio                                             |
| LOC725441        | similar to DEAD (Asp-Glu-Ala-Asp) box polypeptide 49 |
| LOC406097        | integrin betaPS                                      |
| LOC550655        | similar to CG32066-PB, isoform B                     |
| LOC410775        | similar to wing blister CG15288-PB, isoform B        |
| LOC410272        | similar to CG5535-PA, isoform A                      |
| nAChRa5          | neuronal nicotinic acetylcholine Apisa7-2 subunit    |
| CPR5             | similar to CG1259-PB                                 |
| LOC725547        | similar to CG6131-PA                                 |
| LOC724958        | similar to Putative odorant receptor 13a             |
| LOC724320        | similar to transcription factor INI                  |
| LOC411908        | similar to HLA-B associated transcript 5             |
| LOC726127        | similar to JTBR CG1935-PA                            |

**All known genes expressed only in nurse young vs. nurse old.**

| Gene name | Description                                                      |
|-----------|------------------------------------------------------------------|
| LOC725783 | similar to CG11160-PA, isoform A                                 |
| LOC409336 | similar to CG4330-PA                                             |
| LOC410600 | similar to Neu3 CG7649-PB, isoform B                             |
| LOC412598 | similar to CG18507-PA, isoform A                                 |
| LOC725732 | similar to CG30492-PB, isoform B                                 |
| LOC411777 | similar to CG17255-PA, isoform A                                 |
| LOC552662 | similar to CG11265-PA, isoform A                                 |
| Tango10   | similar to CG1841-PA, isoform A                                  |
| Dap160    | similar to intersectin 2 isoform 3                               |
| stnB      | similar to Protein stoned-B (StonedB) (Stn-B)                    |
| LOC552333 | similar to Organic anion transporting polypeptide 26F CG31634-PA |
| LOC726118 | similar to CG30415-PA, isoform A                                 |
| LOC412476 | similar to CG7102-PA                                             |
| LOC727045 | similar to yellow-e2 CG17044-PA                                  |
| rtet      | similar to tetracycline resistance CG5760-PA                     |
| LOC411163 | similar to Nat1 CG12202-PA                                       |
| NT-12     | similar to CG8291-PA, isoform A                                  |
| LOC412065 | similar to CG13646-PA                                            |
| LOC411021 | similar to Ugt86Dc CG4739-PA                                     |
| LOC409969 | similar to dihydrouridine synthase 3-like                        |
| 5-HT1     | similar to SERotonin/octopamine receptor family member (ser-4)   |
| LOC551537 | similar to enoyl Coenzyme A hydratase domain containing 3        |
| Y-g       | yellow-g                                                         |
| LOC410554 | similar to methylcrotonoyl-Coenzyme A carboxylase 2 (beta)       |
| LOC409395 | similar to chromodomain Y-like protein 2                         |
| Lys-2     | similar to CG11159-PA                                            |
| LOC725759 | similar to Peritrophin A CG17058-PA, isoform A                   |
| LOC726801 | similar to CG8032-PA                                             |
| LOC409573 | similar to CG1832-PA, isoform A                                  |
| LOC724776 | hypothetical protein LOC724776                                   |
